# Supplementary material
Source: PubMed Central journal article supplement (PMC8642102)
Supplement: AJA-30-717-s001.pdf [file AJA-30-717-s001.pdf]

**Supplemental Material S1.** Examples of randomized controlled trials delivering CBT therapies for tinnitus between 1988 and 2018.

Further studies can be seen from systematic reviews, for example:

Fuller, T., Cima, R., Langguth, B., Mazurek, B., Vlaeyen, J. W., & Hoare, D. J. (2020). Cognitive behavioural therapy for tinnitus. *Cochrane Database of Systematic Reviews*, (1).

Landry, E. C., Sandoval, X. C. R., Simeone, C. N., Tidball, G., Lea, J., & Westerberg, B. D. (2020). Systematic review and network meta-analysis of cognitive and/or behavioral therapies (CBT) for tinnitus. *Otology & Neurotology*, *41*(2), 153-166.

| Study and country                                        | Groups                                                                                                                   | Intervention description                                                                                                                      |
|----------------------------------------------------------|--------------------------------------------------------------------------------------------------------------------------|-----------------------------------------------------------------------------------------------------------------------------------------------|
| <b>Therapist delivered CBT interventions</b>             |                                                                                                                          |                                                                                                                                               |
| Scott et al.<br>Lindberg et al.<br>1988                  | 1) Individual cognitive therapy ( $n = 12$ )<br>2) Waiting list ( $n = 12$ )                                             | 10 × 1 hour session from a qualified clinical psychologist based on psychological methods                                                     |
| Jakes et al.,<br>1992<br><i>England</i>                  | 1) GCBT $n = 12$<br>2) Masking $n = 14$<br>3) Masking placebo $n = 14$<br>4) Waiting list control $n = 14$               | 5 sessions in groups of 6 by experienced cognitive/ behavioral therapists                                                                     |
| Davies et al.<br>1995<br><i>UK</i>                       | 1) Individual cognitive therapy ( $n = 16$ )<br>2) Applied relaxation ( $n = 16$ )<br>3) Passive relaxation ( $n = 13$ ) | 6 × 1 hour sessions from a qualified clinical psychologist. Cognitive therapy based on the principles of Rational Emotive Therapy.            |
| Henry et al.<br>1996<br><i>Australia for at veterans</i> | 1) Group cognitive coping skills ( $n = 22$ )<br>2) Education only ( $n = 21$ )<br>3) Waiting list ( $n = 22$ )          | 6 × 1.5 hour sessions by a clinical psychologist                                                                                              |
| Henry et al.,<br>1998<br><i>Australia</i>                | Total $n = 50$<br>1) Cognitive restructuring<br>2) Attention control and imagery training<br>3) Combined treatment       | Cognitive restructuring techniques provided                                                                                                   |
| <b>Self-help CBT interventions</b>                       |                                                                                                                          |                                                                                                                                               |
| Andersson et al.,<br>2005<br><i>Sweden</i>               | 1) GCBT $n = 12$<br>2) Waiting list $n = 11$                                                                             | 6 × weekly 2 hour sessions in small groups ( $n = 11$ )                                                                                       |
| Robinson et al.<br>2008<br><i>USA for veterans</i>       | 1) GCBT $n = 38$<br>2) Waiting list $n = 27$                                                                             | 8 × group sessions based on a CBT manual for depression by a psychiatrist and doctoral psychology students                                    |
| Cima et al. 2012<br><i>Netherlands</i>                   | 1) Individualized CBT $n = 245$<br>2) Usual treatment $n = 171$                                                          | CBT together with GCBT where tinnitus was severe (3 different 12 week group treatment options)                                                |
| Zhong et al.<br>2014<br><i>China</i>                     | 1. GCBT $n = 89$<br>2. Masking noise $n = 68$                                                                            | CBT including cognitive restructuring and sifting attention. Treatment frequency and duration and who provided the therapy were not reported. |

|                                                                     |                                                                                                                              |                                                                                                                                                                                                     |
|---------------------------------------------------------------------|------------------------------------------------------------------------------------------------------------------------------|-----------------------------------------------------------------------------------------------------------------------------------------------------------------------------------------------------|
| Malinvaud et al.<br>2016<br><i>France</i>                           | 1. Individual CBT followed by GCBT<br>$n = 58$<br>2. Virtual reality comparison $n = 61$<br>3. Waiting list control $n = 39$ | $2 \times 1$ hour CBT sessions followed by $8 \times 1.5$ hr GCBT sessions provided by a psychologist                                                                                               |
| Martz et al.<br>2018<br><i>USA for veterans</i>                     | 1. GCBT $n = 10$<br>2. GACT $n = 10$<br>3. Group Coping effectiveness training $n = 10$<br>4. Waiting list $n = 10$          | Group sessions on coping skills, acceptance and commitment therapy and CBT                                                                                                                          |
| Schmidt et al.<br>2018<br><i>USA for veterans</i>                   | 1. GCBT $n = 14$<br>2. Audiological counselling $n = 11$                                                                     | Weekly group tinnitus education plus CBT counselling provided by a clinical psychologist                                                                                                            |
| Andersson, Ström, Ström, & Lyttkens, 2002<br><i>Sweden</i>          | 1. ICBT $n = 53$<br>2. Waiting list $n = 64$                                                                                 | 6 weeks: Swedish self-help CBT manual (Kaldo et al., 2004) guided by clinical psychologists                                                                                                         |
| Kaldo et al., 2007<br><i>Sweden</i>                                 | 1. Guided CBT bibliotherapy $n = 34$<br>2. Waiting list $n = 38$                                                             | Swedish Self-help CBT manual (Kaldo et al., 2004) guided by $6 \times 1$ hr long group supervisions by 2 licensed clinical psychologists                                                            |
| Kaldo et al. 2008                                                   | 1. ICBT $n = 25$<br>2. GCBT $n = 25$                                                                                         | 6 weeks Swedish self-help CBT manual (Kaldo et al., 2004) guided by clinical psychologists                                                                                                          |
| Abbott et al. 2009<br><i>Australia</i>                              | 1. ICBT $n = 32$<br>2. Information only, $n = 24$                                                                            |                                                                                                                                                                                                     |
| Hesser et al. 2012<br><i>Sweden</i>                                 | 1. ICBT $n = 32$<br>2. ACT $n = 32$<br>3. Online discussion forum $n = 32$                                                   | Shorter version of the CBT manual, 8 modules guided by clinical psychologists                                                                                                                       |
| Nyenhuis et al 2013<br>Germany (bibliotherapy and information only) | 1. ICBT, $n = 79$<br>2. GCBT, $n = 71$<br>3. Bibliotherapy $n = 77$ , Information only $n = 77$                              | Intervention based on 67 page manual from CBT-oriented Tinnitus Coping Training. Group sessions guided by 3 psychologists<br><br>There was no guidance for the other interventions (only self-help) |
| Jasper et al. 2014<br><i>Germany</i>                                | 1. ICBT, $n = 41$<br>2. GCBT, $n = 43$<br>3. Online discussion forum $n = 44$                                                | 10 weeks German self-help CBT manual (Kaldo et al., 2004) guided by clinical psychologists                                                                                                          |
| Rheker et al. 2015                                                  | 1) ICBT with therapeutic guidance $n = 56$                                                                                   | 10 weeks German self-help CBT manual (Kaldo et al., 2004) guided by psychology supervised students                                                                                                  |

|                                        | 2) ICBT without therapeutic guidance $n = 56$           |                                                                                            |
|----------------------------------------|---------------------------------------------------------|--------------------------------------------------------------------------------------------|
| Weise et al.<br>2016<br><i>Germany</i> | 1. ICBT $n = 62$<br>2. Online discussion forum $n = 62$ | 10 weeks German self-help CBT manual (Kaldo et al., 2004) guided by clinical psychologists |
| Beukes et al.<br>2018a<br><i>UK</i>    | 1. ICBT $n = 73$<br>2. Weekly-check in $n = 73$         | Adapted English self-help CBT manual (Kaldo et al., 2004) guided by a clinical audiologist |
| Beukes et al.<br>2018b<br><i>UK</i>    | 1. ICBT $n = 46$<br>2. Individualized F2F $n = 46$      | Adapted English self-help CBT manual (Kaldo et al., 2004) guided by a clinical audiologist |
